# Supplementary material for: Design of nanostructured 2D (photo-)electrocatalysts for biomass valorization coupled with H2 production
Source: Royal Society of Chemistry journal article supplement (doi:10.1039/d4se01034e), 2024-01-01
Supplement: d4se01034e2.pdf [file d4se01034e2.pdf]

## Electronic Supplementary Information

### Design of nanostructured 2D (photo-)electrocatalysts for biomass valorization coupled with H<sub>2</sub> production

Bahareh Feizi Mohazzab,<sup>a\*</sup> Kiarash Torabi,<sup>b</sup> and Dandan Gao<sup>a\*</sup>

<sup>a</sup> Dr. Bahareh Feizi Mohazzab, Dr. Dandan Gao

Department of Chemistry, Johannes Gutenberg University Mainz

Duesbergweg 10-14, 55128 Mainz, Germany

E-mails: bahareh.feizimohazzab@uni-mainz.de; dandan.gao@uni-mainz.de

<sup>b</sup> M.Sc. Kiarash Torabi

Department of Materials Engineering and Metallurgy, Faculty of Engineering

Arak University, Arak 3815688349, Iran

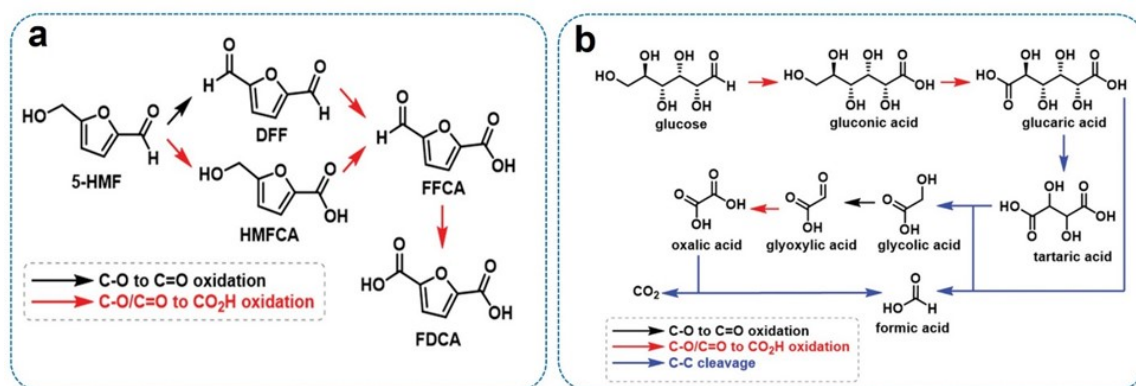

**Fig. S1.** Schematic illustration of catalytic mechanism for (a) HMF and (b) glucose. These figures have been reproduced from Ref.<sup>1</sup> with permission from Wiley, copyright 2021.

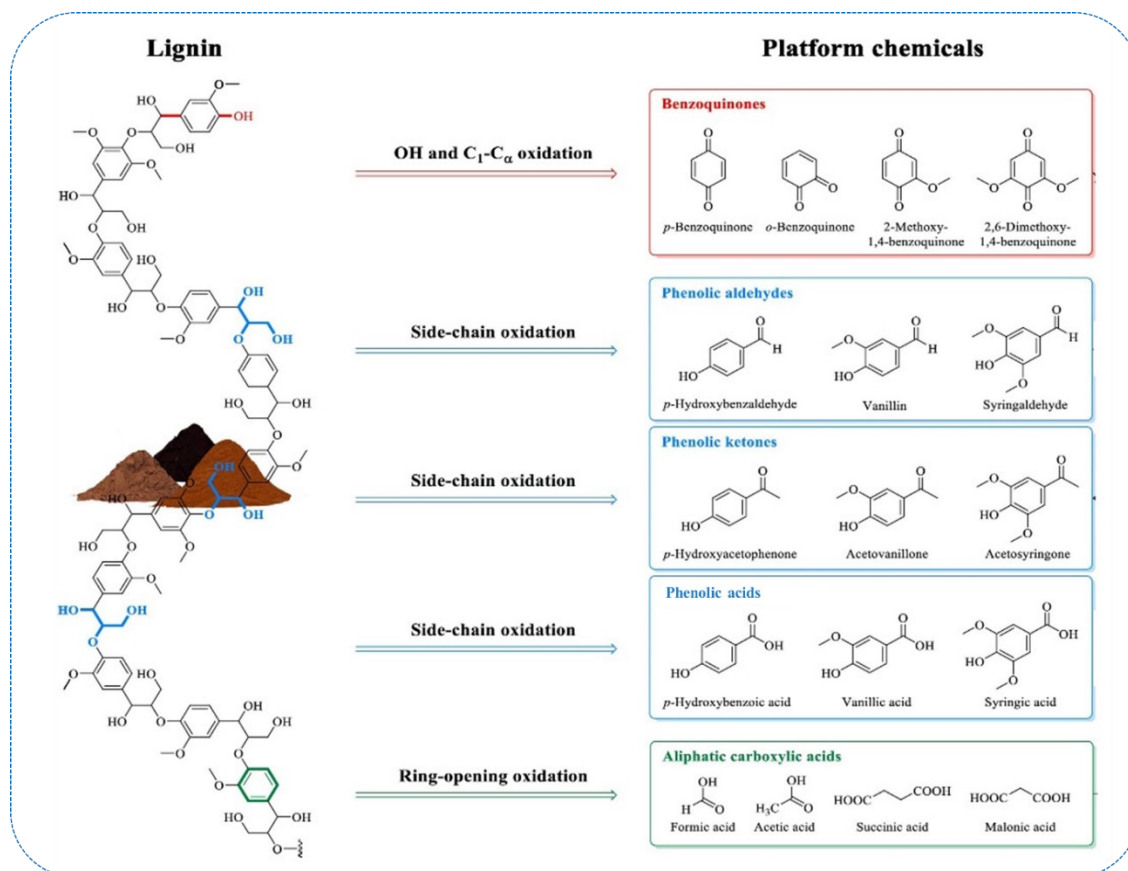

**Fig. S2.** Schematic illustration of catalytic oxidation pathways for lignin. This figure has been reproduced from Ref.<sup>2</sup> with permission from Elsevier, copyright 2019.

**Table S1:** An overview of biomass and valorization involved in this review.

| <b>Biomass</b> | <b>Source</b>                                                                                                                                          | <b>Catalytic reactions and products</b>                                                                                                                                                                                                                                                                                                                                                                                            | <b>Products applications</b>                                                                                                                                                                                                   | <b>Developed catalysts</b>                                                                                                                                                                     | <b>Ref.</b> |
|----------------|--------------------------------------------------------------------------------------------------------------------------------------------------------|------------------------------------------------------------------------------------------------------------------------------------------------------------------------------------------------------------------------------------------------------------------------------------------------------------------------------------------------------------------------------------------------------------------------------------|--------------------------------------------------------------------------------------------------------------------------------------------------------------------------------------------------------------------------------|------------------------------------------------------------------------------------------------------------------------------------------------------------------------------------------------|-------------|
| HMF            | <ul style="list-style-type: none"> <li>Dehydration of simple sugars like fructose</li> <li>Biomass: cellulose and lignocellulosic materials</li> </ul> | <ul style="list-style-type: none"> <li>C1 oxidation (aldehyde groups): 2,5-Furandicarboxylic Acid (FDCA) and 2,5-Diformylfuran (DFF)</li> <li>C6 oxidation (Hydroxymethyl Group): 5-Hydroxymethyl-2-furancarboxylic Acid (HMFCFA)</li> <li>C1 reduction (Aldehyde Group): 2,5-Bis(hydroxymethyl)furan (BHMF)</li> <li>C6 reduction (Hydroxymethyl Group): 2,5-Dimethylfuran (DMF)</li> </ul>                                       | <ul style="list-style-type: none"> <li>Bio-based Plastics (e.g. FDCA)</li> <li>Fine Chemicals (e.g. DFF and BHMF)</li> <li>Biofuels (e.g. DMF)</li> </ul>                                                                      | <ul style="list-style-type: none"> <li>Ni, Co, Mo-based</li> <li>Metal nanoparticles: Pt, Pd</li> <li>Semiconductors: BiVO<sub>4</sub>, WO<sub>3</sub>, Fe<sub>2</sub>O<sub>3</sub></li> </ul> | 3-15        |
| Glucose        | <ul style="list-style-type: none"> <li>Food Processing Residues</li> <li>Lignocellulosic biomass:</li> </ul>                                           | <ul style="list-style-type: none"> <li>C1 oxidation (aldehyde groups): gluconic acid (GNA)</li> <li>C6 oxidation (hydroxymethyl groups): glucaric acid (GRA)</li> <li>C1-C2 cleavage: formic acid (FA) and arabinose (AR)</li> <li>C2-C3 cleavage: acetic acid (AA)</li> <li>C3-C4 cleavage: lactic acid (LA), and glycerol (GLY)</li> <li>Isomerism: Fructose</li> </ul>                                                          | <ul style="list-style-type: none"> <li>Food and Beverage Industry: As a sweetener and energy source</li> <li>Pharmaceuticals: For medical treatments and supplements</li> <li>Biofuels: As a feedstock for ethanol</li> </ul>  | <ul style="list-style-type: none"> <li>Ni-based</li> <li>Metal nanoparticles: Pt, Pd,</li> <li>Semiconductors: Bi<sub>2</sub>WO<sub>6</sub>, BiVO<sub>4</sub></li> </ul>                       | 16-25       |
| Lignin         | <ul style="list-style-type: none"> <li>Wood</li> <li>Agriculture residues</li> <li>Grasses</li> </ul>                                                  | <ul style="list-style-type: none"> <li>OH and C<sub>1</sub>-C<sub>α</sub> oxidation: Benzoquinones (p-Benzoquinone, o-Benzoquinone, 2-Methoxy-1,4-benzoquinone, and 2,6-Dimethoxy-1,4-benzoquinone)</li> <li>Side-chain oxidation: Phenolic aldehydes (p Hydroxybenzaldehyde, Vanillin, and Syringaldehyde)</li> <li>Side-chain oxidation: Phenolic ketones (p-Hydroxyacetophenone, Acetovanillone, and Acetosyringone)</li> </ul> | <ul style="list-style-type: none"> <li>Animal Feed: As a binding agent</li> <li>Biofuels: As a renewable energy source</li> <li>Chemicals: For producing macromolecules used in bitumen, biofuels, and bio-refinery</li> </ul> | <ul style="list-style-type: none"> <li>Ni-based</li> <li>Metal oxide: IrO<sub>2</sub>, PbO<sub>2</sub></li> <li>Semiconductors: TiO<sub>2</sub>, g-C<sub>3</sub>N<sub>4</sub>, CdS</li> </ul>  | 2, 26-36    |

- 
- Side-chain oxidation: Phenolic acids (p-Hydroxybenzoic acid, Vanillic acid, and Syringic acid) catalysts
  - Ring-opening oxidation: Aliphatic carboxylic acids (Formic acid, Acetic acid, Succinic acid, and Malonic acid)
-

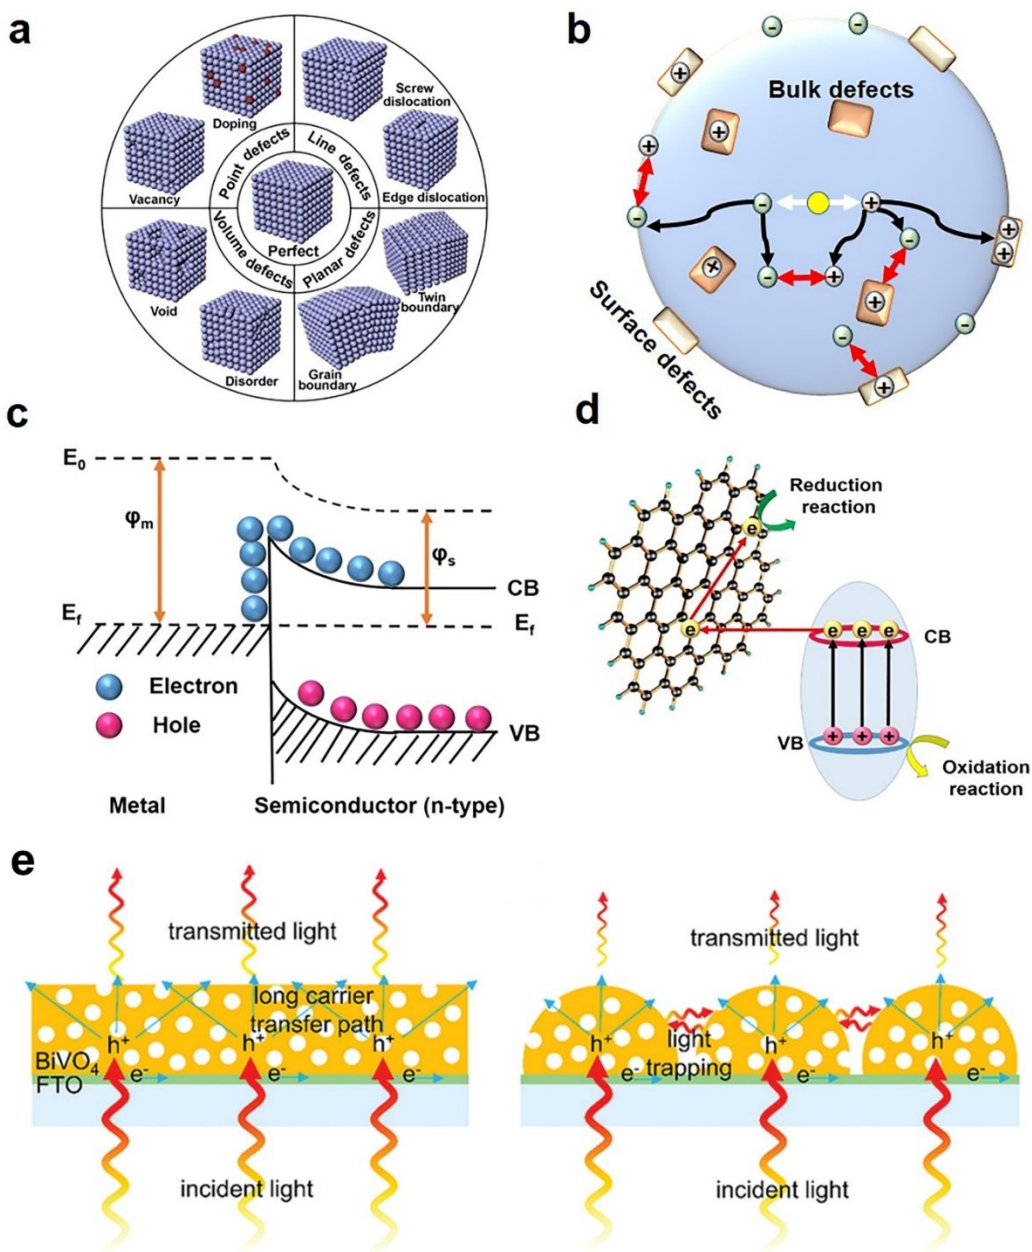

**Fig. S3.** Schematic illustration of (a) the defects with different atomic arrangement structures (This figure has been reproduced from Ref.<sup>37</sup> with permission from Elsevier, copyright 2018), (b) recombination pathways of photo-generated electrons and holes on semiconductors with surface and bulk defects, (c) Schottky barrier (where  $\phi_s$  and  $\phi_m$  represent work function of semiconductor and metal, respectively.), and (d) the charge transfer mechanism for graphene-semiconductor heterostructure, (e) schematic of light penetration a flat film and nanosphere arrays (These figures have been reproduced from Ref.<sup>38</sup> with permission from American chemical society, copyright 2017.)

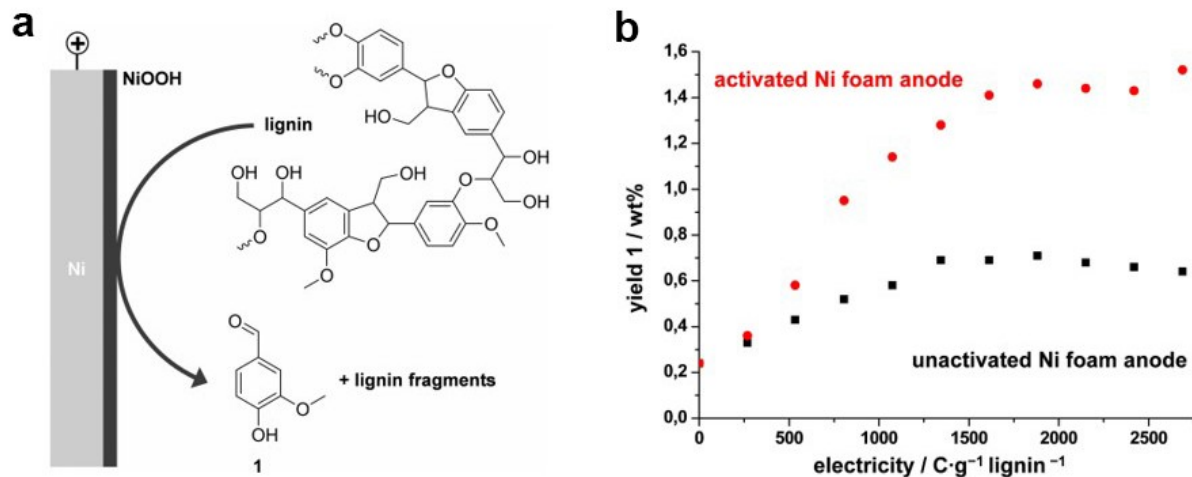

**Fig. S4.** Schematic illustration of (a) electrochemical lignin oxidation on Ni foam electrode and (b) influence of applied potential on lignin degradation. These figures have been reproduced from Ref.<sup>39</sup> with permission from European chemical societies publishing, copyright 2018.

**Table S2.** A comprehensive study of reported articles on HMF-, glucose-, and lignin-assisted H<sub>2</sub> production. ( $E_{\text{OER//HER}}$  and  $E_{\text{BOR//HER}}$  show required potential for conventional water electrolysis and hybrid water electrolysis, respectively.)

| Anode    Cathode                                                 | Electrolyte             | $E_{\text{OER//HER}} - E_{\text{BOR//HER}}$ /<br>Current density<br>(mA cm <sup>-2</sup> ) | Products<br>Yields                                      | Hydrogen<br>production yields    | Ref. |
|------------------------------------------------------------------|-------------------------|--------------------------------------------------------------------------------------------|---------------------------------------------------------|----------------------------------|------|
| <b>Heteroatom doping</b>                                         |                         |                                                                                            |                                                         |                                  |      |
| BiCoO-NA/NF    BiCoO-NA/NF                                       | 1 M KOH + 10 mM HMF     | 0.1 V / 50                                                                                 | FDCA<br>FE: 97.7%<br>Yield: 362.5 μmol h <sup>-1</sup>  | Yield: 7.33 μmol h <sup>-1</sup> | 40   |
| Ni <sub>0.9</sub> Cu <sub>0.1</sub> (OH) <sub>2</sub>    Pt wire | 1.0 M KOH + 5 mM HMF    | 0.29 V / 100                                                                               | FDCA<br>FE: 91.2%                                       | -                                | 41   |
| Co@NPC-800    Co@NPC-800                                         | 1 M KOH+ 0.1 M glucose  | 0.18 V / 10                                                                                | Lactic acid and formic acid<br>FE: 45.4% and 15.2%      | FE: 98.9%                        | 42   |
| Fe-Ni <sub>2</sub> P@C/NF    Fe-Ni <sub>2</sub> P@C/NF           | 1 M KOH + 20 mM glucose | 0.11 V / 100                                                                               | Lactic acid and formic acid<br>Yield: 52.1 % and 35.6 % | FE: 98.2%                        | 43   |
| <b>Defect/vacancy engineering</b>                                |                         |                                                                                            |                                                         |                                  |      |
| NiVW <sub>v</sub> -LMH    Pt foil                                | 1.0 m KOH+ 10 mM HMF    | 0.26 V / 50                                                                                | FDCA<br>Yield: 99.2 %                                   | -                                | 44   |
| CuMn <sub>2</sub> O <sub>4</sub> -NH <sub>3</sub>    Pt wire     | 1.0 M KOH + 10 mM HMF   | 0.05 V / 20                                                                                | FDCA                                                    | -                                | 45   |

|                                                                                                    |                                                                                                          |              |                                                                      |                                                         |    |
|----------------------------------------------------------------------------------------------------|----------------------------------------------------------------------------------------------------------|--------------|----------------------------------------------------------------------|---------------------------------------------------------|----|
|                                                                                                    |                                                                                                          |              |                                                                      | FE: 96%                                                 |    |
| Pt/def-TiO <sub>2</sub> RNAs    Pt foil                                                            | 1 M KOH + 10 mM glucose<br>Light condition: Xenon lamp (300 W, AM 1.5G filter, 100 mW cm <sup>-2</sup> ) | 0.4 V / 1.2  | gluconic acid (GLU) and glucaric acid (GLA)<br>Yield: 84.3% and 9.2% | FE: 99%                                                 | 46 |
| <b>Co-catalysts engineering</b>                                                                    |                                                                                                          |              |                                                                      |                                                         |    |
| Ni <sub>3</sub> N-V <sub>2</sub> O <sub>3</sub>    Ni <sub>3</sub> N-V <sub>2</sub> O <sub>3</sub> | 1.0 M KOH + 10 mM HMF                                                                                    | 0.13 V / 10  | FDCA<br>Selectivity: 98.7%<br>Yield: 96.1%                           | FE: 100%                                                | 47 |
| Ir-NiFeO@NF    Ir-NiFeO@NF                                                                         | 1.0 M KOH + 10 mM 1-phenylethanol                                                                        | 0.15 V / 100 | Benzoic acids                                                        | 0.45 mmol h <sup>-1</sup> cm <sup>-2</sup><br>FE: 100 % | 48 |
| <b>Heterostructure design</b>                                                                      |                                                                                                          |              |                                                                      |                                                         |    |
| Ni/Ni <sub>0.2</sub> Mo <sub>0.8</sub> N/NF    Ni/Ni <sub>0.2</sub> Mo <sub>0.8</sub> N/NF         | 1 M KOH + 50 mM HMF                                                                                      | 1.4 V / 50   | FDCA<br>Yield: 98.5%                                                 | -                                                       | 49 |
| Ni <sub>x</sub> Se <sub>y</sub> -NiFe LDH@NF    Pt sheet                                           | Anolyte (1.0 M KOH + 10 mM HMF)/ catholyte (1.0 M KOH)                                                   | 1 V / 40     | FDCA<br>FE: 96.7%<br>Yield: 99.3%                                    | -                                                       | 50 |



|                                                                                            |                                                                       |             |                                                 |                                 |    |
|--------------------------------------------------------------------------------------------|-----------------------------------------------------------------------|-------------|-------------------------------------------------|---------------------------------|----|
| Cu <sub>x</sub> S@NiCo-LDHs    Cu <sub>x</sub> S@NiCo-LDHs                                 | 1 M KOH (pH 13.8) + 10 mM HMF                                         | 2.2 V / 100 | FDCA<br>FE: 100%                                | FE: 100%                        | 51 |
| Fe <sub>3</sub> O <sub>4</sub> /Au/CoFe-LDH    Fe <sub>3</sub> O <sub>4</sub> /Au/CoFe-LDH | 1 M KOH + 0.5 M glucose                                               | 1 V / 50    | Gluconate<br>FE: 100 % @ 50 mA cm <sup>-2</sup> | 99.6 % @ 50 mA cm <sup>-2</sup> | 52 |
| β-PbO <sub>2</sub> /MWNTs    Pt black cathode                                              | Anolyte: 1 M NaOH + 10 g L <sup>-1</sup> lignin<br>catholyte: 1M NaOH | -           | -                                               | 98.7 % @ 20 mA cm <sup>-2</sup> | 53 |
| NiCo/TiO <sub>2</sub>    Pt-loaded carbon clothe                                           | Anolyte: 1 M NaOH + 50 g/L lignin<br>Catholyte: 1 M NaOH              | 0.5 V / 10  | -                                               | FE: 100 %                       | 54 |
| <b>Surface engineering</b>                                                                 |                                                                       |             |                                                 |                                 |    |
| t-NiCo-MOF)    MoNi <sub>4</sub>                                                           | 1.0 M KOH + 10 mM HMF                                                 | 0.3 V / 100 | FDCA<br>FE: 98%                                 | -                               | 55 |
| NiS@NOSC    NiS@NOSC                                                                       | 1.0 M KOH + 10 mM HMF                                                 | 1.5 V / 50  | FDCA<br>Yield: 99.6%                            | FE: 100%                        | 56 |
| CoNW/NF    CoNW/NF                                                                         | 1.0 M KOH + 100 mM HMF                                                | 0.3 / 50    | FDCA<br>Yield: 96.8%<br>FE: 96.6%               | FE: 100%                        | 57 |
|                                                                                            | 0.5 M NaCl (pH: 7) + 0.1 M                                            |             | Gluconic and Glucaric acids, Erythrose and      |                                 |    |

|                                                                          |                                                                                     |              |                                                                          |                                                 |    |
|--------------------------------------------------------------------------|-------------------------------------------------------------------------------------|--------------|--------------------------------------------------------------------------|-------------------------------------------------|----|
|                                                                          | glucose                                                                             |              | Arabinose                                                                |                                                 |    |
|                                                                          | Light condition:<br>AM 1.5 G                                                        |              | Total FE: 64%                                                            |                                                 |    |
| CNF-60    CNF-60                                                         | 1.0 M KOH + 0.15<br>M glucose                                                       | 0.26 V / 10  | -                                                                        | -                                               | 59 |
| NiSn <sub>20%</sub>    NiSn <sub>20%</sub>                               | Anolyte: 1.0 M<br>NaOH + 10 g l <sup>-1</sup><br>Lignin<br>Catholyte: 1.0 M<br>NaOH | 0.5 V / 10   | Vanillin<br>production rate: 300<br>g/kg lignin min <sup>-1</sup>        | 72 ml h <sup>-1</sup>                           | 60 |
| <b>2D materials/ 3D supports</b>                                         |                                                                                     |              |                                                                          |                                                 |    |
| Co <sub>3</sub> O <sub>4</sub> /CF    Co <sub>3</sub> O <sub>4</sub> /CF | 1.0 M KOH + 10<br>mM HMF                                                            | 0.2 V / 50   | FDCA<br>FE: 92.9 %                                                       | FE: 99.8 %                                      | 61 |
| Co(OH) <sub>2</sub> -CeO <sub>2</sub>    Pt wire                         | 0.1 M PBS + 10<br>mM HMF                                                            | 0.2 V / 10   | 2-furancarboxylic acid<br>(HMFA)<br>Selectivity: 89.4 %<br>Yield: 85.8 % | 114.39 μmol cm <sup>-2</sup><br>h <sup>-1</sup> | 62 |
| CF@CoNC-2T    CF@CoNC-2T                                                 | 1 M KOH + 100<br>mM glucose                                                         | 0.88 V / 100 | Gluconic acid (GNA)<br>and glucaric acid<br>(GRA)                        | FE: 100 %                                       | 63 |
| NiFeO <sub>x</sub>    NiFeN <sub>x</sub>                                 | 1 M of KOH + 100<br>mM glucose                                                      | 2.5 V / 100  | Glucaric acid (GRA)<br>FE: 87%<br>Yield: 83%                             | -                                               | 64 |

---

|                                                                        |                                                  |            |                       |   |    |
|------------------------------------------------------------------------|--------------------------------------------------|------------|-----------------------|---|----|
| NF@Co <sub>3</sub> S <sub>4</sub> /( $\alpha,\beta$ )-NiS    Pt sheets | 1.0 M KOH + 1 mM 2-phenoxy-1-phenylethanol (PPE) | 0.7 V / 60 | Benzoate<br>FE: 83.3% | - | 65 |
|------------------------------------------------------------------------|--------------------------------------------------|------------|-----------------------|---|----|

---

### 3. Notes and References

1. H. Luo, J. Barrio, N. Sunny, A. Li, L. Steier, N. Shah, I. E. Stephens and M. M. Titirici, *Adv. Energy Mater.*, 2021, **11**, 2101180.
2. C. Liu, S. Wu, H. Zhang and R. Xiao, *Fuel Process. Technol.*, 2019, **191**, 181-201.
3. B. You, N. Jiang, X. Liu and Y. Sun, *Angew. Chem., Int. Ed.*, 2016, **55**, 9913-9917.
4. T.-W. Tzeng, C.-Y. Lin, C.-W. Pao, J.-L. Chen, R. J. G. Nuguid and P.-W. Chung, *Fuel Process. Technol.*, 2020, **199**, 106225.
5. S. P. Teong, G. Yi and Y. Zhang, *Green Chem.*, 2014, **16**, 2015-2026.
6. W.-J. Liu, L. Dang, Z. Xu, H.-Q. Yu, S. Jin and G. W. Huber, *ACS Catal.*, 2018, **8**, 5533-5541.
7. M. Cai, Y. Zhang, Y. Zhao, Q. Liu, Y. Li and G. Li, *J. Mater. Chem. A*, 2020, **8**, 20386-20392.
8. Q. Zhang, J. Zuo, L. Wang, F. Peng, S. Chen and Z. Liu, *ACS omega*, 2021, **6**, 10910-10920.
9. C. Yang, C. Wang, L. Zhou, W. Duan, Y. Song, F. Zhang, Y. Zhen, J. Zhang, W. Bao and Y. Lu, *J. Chem. Eng.*, 2021, **422**, 130125.
10. M. Cai, Y. Zhang, Y. Zhao, Q. Liu, Y. Li and G. Li, *J. Mater. Chem. A*, 2020, **8**, 20386-20392.
11. S. R. Kubota and K.-S. Choi, *ChemSusChem*, 2018, **11**, 2138-2145.
12. A. S. Chauhan, A. Kumar, R. Bains, M. Kumar and P. Das, *Biomass and Bioenergy*, 2024, **185**, 107209.
13. H. G. Cha and K.-S. Choi, *Nat. Chem.*, 2015, **7**, 328-333.
14. C. R. Lhermitte, N. Plainpan, P. Canjura, F. Boudoire and K. Sivula, *RSC Adv.*, 2021, **11**, 198-202.
15. H. Yuan, P. Zhou, X. Gao, M. Xing, S. Lv, D. Zhang, H. Mou, Y. L. Pak and J. Song, *ACS Applied Nano Materials*, 2024, **7**, 10387-10395.
16. K. Lu, Y. Zhang, Y. Shen and H. Li, *Catal. Sci. Technol.*, 2024.
17. J. Wang, X. Wang, H. Zhao, J. F. Van Humbeck, B. N. Richtig, M. R. Dolgos, A. Seifitokaldani, M. G. Kibria and J. Hu, *ACS Catal.*, 2022, **12**, 14418-14428.
18. W.-J. Liu, Z. Xu, D. Zhao, X.-Q. Pan, H.-C. Li, X. Hu, Z.-Y. Fan, W.-K. Wang, G.-H. Zhao and S. Jin, *Nat. Commun.*, 2020, **11**, 265.
19. S. Jana, A. Mondal and A. Ghosh, *Appl. Catal. B*, 2018, **232**, 26-36.
20. X. Liu, P. Cai, G. Wang and Z. Wen, *Int. J. Hydrogen Energy.*, 2020, **45**, 32940-32948.
21. M. P. Van der Ham, T. Hersbach, J. Delgado, B. Matson, J. Lim, M. Führer, T. Van Haasterecht, M. Verhoeven, E. Hensen and D. Sokaras, *Appl. Catal. B*, 2023, **338**, 123046.
22. D. Basu and S. Basu, *Int. J. Hydrogen Energy.*, 2011, **36**, 14923-14929.
23. Y. Zhao, J. Dobson, C. Harabajiu, E. Madrid, T. Kanyanee, C. Lyall, S. Reeksting, M. Carta, N. B. McKeown and L. Torrente-Murciano, *Bioelectrochemistry*, 2020, **134**, 107499.
24. L. Madriz, J. Tatá, D. Carvajal, O. Núñez, B. R. Scharifker, J. Mostany, C. Borrás, F. M. Cabrerizo and R. Vargas, *Renewable Energy*, 2020, **152**, 974-983.
25. L. He, Z. Yang, C. Gong, H. Liu, F. Zhong, F. Hu, Y. Zhang, G. Wang and B. Zhang, *J. Electroanal. Chem.*, 2021, **882**, 114912.
26. W. Deng, Q. Zhang and Y. Wang, *Catal. Today*, 2014, **234**, 31-41.
27. S. Stiefel, A. Schmitz, J. Peters, D. Di Marino and M. Wessling, *Green Chem.*, 2016, **18**, 4999-5007.
28. D. Di Marino, D. Stöckmann, S. Kriescher, S. Stiefel and M. Wessling, *Green Chem.*, 2016, **18**, 6021-6028.
29. S. Stiefel, J. Lölsberg, L. Kipshagen, R. Möller-Gulland and M. Wessling, *Electrochem. commun.*, 2015, **61**, 49-52.
30. M. Zirbes, L. Quadri, M. Breiner, A. Stenglein, A. Bomm, W. Schade and S. Waldvogel, *Eng*, 2020, **8**, 7300-7307.
31. R. Tolba, M. Tian, J. Wen, Z.-H. Jiang and A. Chen, *J. Electroanal. Chem.*, 2010, **649**, 9-15.
32. K. Pan, M. Tian, Z.-H. Jiang, B. Kjartanson and A. Chen, *Electrochim. Acta*, 2012, **60**, 147-153.
33. S. Sultana, K. Syrek and G. D. Sulka, *Sustainable Energy & Fuels*, 2024, **8**, 2383-2422.
34. X. Liu, Z. Jiang, X. Cao, Z. Shen, W. Zhao, F. Wang, M. Cui and C. Liang, *Green Chem.*, 2024, **26**, 1935-1948.
35. Y. Lu, Y. Fan, S. Xu and Y. Li, *Catal. Sci. Technol.*, 2024, **14**, 2294-2304.
36. M. Zhang, Z. Li, Y. Feng, X. Xin, G.-Y. Yang and H. Lv, *Green Chem.*, 2023, **25**, 10091-10100.
37. S. Bai, N. Zhang, C. Gao and Y. Xiong, *Nano Energy*, 2018, **53**, 296-336.
38. Y. Zhou, L. Zhang, L. Lin, B. R. Wygant, Y. Liu, Y. Zhu, Y. Zheng, C. B. Mullins, Y. Zhao and X. Zhang, *Nano Lett.*, 2017, **17**, 8012-8017.
39. M. Zirbes, D. Schmitt, N. Beiser, D. Pitton, T. Hoffmann and S. R. Waldvogel, *ChemElectroChem*, 2019, **6**, 155-161.
40. T. Wei, W. Liu, S. Zhang, Q. Liu, J. Luo and X. Liu, *ChemComm*, 2023, **59**, 442-445.
41. J. Zhang, P. Yu, G. Zeng, F. Bao, Y. Yuan and H. Huang, *J. Mater. Chem. A*, 2021, **9**, 9685-9691.
42. D. Li, Y. Huang, Z. Li, L. Zhong, C. Liu and X. Peng, *J. Chem. Eng.*, 2022, **430**, 132783.
43. D. Li, Z. Li, R. Zou, G. Shi, Y. Huang, W. Yang, W. Yang, C. Liu and X. Peng, *Appl. Catal. B*, 2022, **307**, 121170.
44. B. Zhang, Z. Yang, C. Yan, Z. Xue and T. Mu, *Small*, 2023, **19**, 2207236.
45. B. Zhu, Y. Qin, J. Du, F. Zhang and X. Lei, *ACS Sustain Chem Eng*, 2021, **9**, 11790-11797.
46. Z. Tian, Y. Da, M. Wang, X. Dou, X. Cui, J. Chen, R. Jiang, S. Xi, B. Cui and Y. Luo, *Nat. Commun.*, 2023, **14**, 142.
47. S. Liang, L. Pan, T. Thomas, B. Zhu, C. Chen, J. Zhang, H. Shen, J. Liu and M. Yang, *J. Chem. Eng.*, 2021, **415**, 128864.

48. J. Miao, Y. Ma, X. Wang, Y. Li, H. Wang, L. Zhang, J. Zhang, Y. Qin and J. Gao, *Appl. Catal. B*, 2023, 122937.
49. M. Sun, J. Yang, J. Huang, Y. Wang, X. Liu, Y. Qi and L. Zhang, *Langmuir*, 2023, **39**, 3762-3769.
50. Y. Zhong, R.-Q. Ren, J.-B. Wang, Y.-Y. Peng, Q. Li and Y.-M. Fan, *Catal. Sci. Technol.*, 2022, **12**, 201-211.
51. X. Deng, X. Kang, M. Li, K. Xiang, C. Wang, Z. Guo, J. Zhang, X.-Z. Fu and J.-L. Luo, *J. Mater. Chem. A*, 2020, **8**, 1138-1146.
52. F. Sun, Y. Zhou, Z. You, H. Xia, Y. Tuo, S. Wang, C. Jia and J. Zhang, *Small*, 2021, **17**, 2103307.
53. F. Bateni, M. NaderiNasrabadi, R. Ghahremani and J. A. Staser, *J. Electrochem. Soc.*, 2019, **166**, F1037.
54. M. NaderiNasrabadi, F. Bateni, Z. Chen, P. B. Harrington and J. A. Staser, *J. Electrochem. Soc.*, 2019, **166**, E317.
55. X. Deng, M. Li, Y. Fan, L. Wang, X.-Z. Fu and J.-L. Luo, *Appl. Catal. B*, 2020, **278**, 119339.
56. C. Sun, D. Zhang, Y. Zhao, C. Song and D. Wang, *COLL SURF A COLLOID SURF A PHYSICOCHEM ENG*, 2022, **650**, 129597.
57. Z. Zhou, C. Chen, M. Gao, B. Xia and J. Zhang, *Green Chem.*, 2019, **21**, 6699-6706.
58. K. Jakubow-Piotrowska, B. Witkowski and J. Augustynski, *Commun. Chem.*, 2022, **5**, 125.
59. Y. Wang, W. Yan, M. Ni, C. Zhu and H. Du, *ChemComm*, 2023, **59**, 2485-2488.
60. R. Ghahremani, F. Farales, F. Bateni and J. A. Staser, *J. Electrochem. Soc.*, 2020, **167**, 043502.
61. C. Chen, Z. Zhou, J. Liu, B. Zhu, H. Hu, Y. Yang, G. Chen, M. Gao and J. Zhang, *Appl. Catal. B*, 2022, **307**, 121209.
62. Y. Xie, L. Sun, X. Pan, Z. Zhou and G. Zhao, *Appl. Catal. B*, 2023, **338**, 123068.
63. Y. Xin, F. Wang, L. Chen, Y. Li and K. Shen, *Green Chem.*, 2022, **24**, 6544-6555.
64. W.-J. Liu, Z. Xu, D. Zhao, X.-Q. Pan, H.-C. Li, X. Hu, Z.-Y. Fan, W.-K. Wang, G.-H. Zhao, S. Jin, G. W. Huber and H.-Q. Yu, *Nat. Commun.*, 2020, **11**, 265.
65. N. Wang, R. Xue, N. Yang, H. Sun, B. Zhang, Z. Ma, Y. Ma and L. Zang, *J. Alloys Compd.*, 2022, **929**, 167324.
